# Supplementary material for: Conjugative RP4 Plasmid-Mediated Transfer of Antibiotic Resistance Genes to Commensal and Multidrug-Resistant Enteric Bacteria In Vitro
Source: MDPI journal article supplement (doi:10.3390/microorganisms11010193), 2023-01-12
Supplement: s1 [file s1]

**Table S1.** Virulence genes present in Commensal gut *E. coli* LM715-1.

| Gene Function                                                                                 | Gene        |
|-----------------------------------------------------------------------------------------------|-------------|
| TonB-dependent hemin, ferrichrome receptor                                                    | <i>chuA</i> |
| Hemin transport protein HmuS                                                                  | <i>chuS</i> |
| Periplasmic hemin-binding protein                                                             | <i>chuT</i> |
| Hemin ABC transporter, permease protein                                                       | <i>chuU</i> |
| ABC-type hemin transport system, ATPase component                                             | <i>chuV</i> |
| Putative oxygen independent coproporphyrinogen III oxidase, heme uptake                       | <i>chuW</i> |
| Putative heme iron utilization protein                                                        | <i>chuX</i> |
| Flavin reductase                                                                              | <i>chuY</i> |
| curli production assembly/transport protein CsgG                                              | <i>csgG</i> |
| 2,3-dihydro-2,3-dihydroxybenzoate dehydrogenase                                               | <i>entA</i> |
| Enterobactin synthase component B                                                             | <i>entB</i> |
| Isochorismate synthase EntC                                                                   | <i>entC</i> |
| Enterobactin synthase component D, phosphopantetheinyl transferase                            | <i>entD</i> |
| Enterobactin synthase component E                                                             | <i>entE</i> |
| Enterobactin synthase component F                                                             | <i>entF</i> |
| Enterobactin exporter EntS, iron-regulated                                                    | <i>entS</i> |
| Putative adhesin FdeC                                                                         | <i>fdeC</i> |
| TonB-dependent receptor; Outer membrane receptor for ferric enterobactin and colicins B, D    | <i>fepA</i> |
| Ferric enterobactin-binding periplasmic protein FepB                                          | <i>fepB</i> |
| Ferric enterobactin transport ATP-binding protein FepC                                        | <i>fepC</i> |
| Ferric enterobactin transport system permease protein FepD                                    | <i>fepD</i> |
| Ferric enterobactin transport system permease protein FepG                                    | <i>fepG</i> |
| Enterobactin esterase                                                                         | <i>fes</i>  |
| Type-1 fimbrial protein, A chain precursor                                                    | <i>fimA</i> |
| Type 1 fimbriae regulatory protein FimB                                                       | <i>fimB</i> |
| Chaperone protein FimC                                                                        | <i>fimC</i> |
| Outer membrane usher protein FimD                                                             | <i>fimD</i> |
| Type 1 fimbriae regulatory protein FimE                                                       | <i>fimE</i> |
| Protein FimF (regulates length and adhesion of type 1 fimbriae)                               | <i>fimF</i> |
| Protein FimG (regulates length and adhesion of type 1 fimbriae)                               | <i>fimG</i> |
| Protein FimH (regulates length and adhesion of type 1 fimbriae, and mediates mannose binding) | <i>fimH</i> |
| Fimbrin-like protein FimI                                                                     | <i>fimI</i> |
| Formate efflux transporter FocA                                                               | <i>focA</i> |
| Chaperone protein FocC                                                                        | <i>focC</i> |
| Outer membrane usher protein FimD                                                             | <i>focD</i> |
| F1C Putative fimbrial adhesin precursor                                                       | <i>focH</i> |
| pesticin/yersiniabactin receptor protein                                                      | <i>fyuA</i> |
| General secretion pathway protein C                                                           | <i>gspC</i> |
| General secretion pathway protein D                                                           | <i>gspD</i> |
| General secretion pathway protein E                                                           | <i>gspE</i> |
| General secretion pathway protein F                                                           | <i>gspF</i> |
| General secretion pathway protein G                                                           | <i>gspG</i> |
| General secretion pathway protein H                                                           | <i>gspH</i> |
| General secretion pathway protein I                                                           | <i>gspI</i> |
| General secretion pathway protein J                                                           | <i>gspJ</i> |
| General secretion pathway protein K                                                           | <i>gspK</i> |
| General secretion pathway protein L                                                           | <i>gspL</i> |
| General secretion pathway protein M                                                           | <i>gspM</i> |

|                                                                                                                      |                  |
|----------------------------------------------------------------------------------------------------------------------|------------------|
| Glycosyltransferase IroB                                                                                             | <i>iroB</i>      |
| ABC transporter protein IroC                                                                                         | <i>iroC</i>      |
| Trilactone hydrolase IroD                                                                                            | <i>iroD</i>      |
| Periplasmic esterase IroE                                                                                            | <i>iroE</i>      |
| Outer Membrane Siderophore Receptor IroN                                                                             | <i>iroN</i>      |
| iron acquisition yersiniabactin synthesis enzyme ( <i>irp1</i> , polyketide synthetase)                              | <i>irp1</i>      |
| yersiniabactin biosynthetic protein <i>Irp2</i>                                                                      | <i>irp2</i>      |
| Capsular polysaccharide export system periplasmic protein <i>KpsD</i>                                                | <i>kpsD</i>      |
| Capsular polysaccharide ABC transporter, permease protein <i>KpsM</i>                                                | <i>kpsM</i>      |
| Capsular polysaccharide ABC transporter, ATP-binding protein <i>KpsT</i>                                             | <i>kpsT</i>      |
| outer membrane protein A                                                                                             | <i>ompA</i>      |
| Pap fimbrial major pilin protein                                                                                     | <i>papA</i>      |
| Outer membrane usher protein <i>PapC</i>                                                                             | <i>papC</i>      |
| Chaperone protein <i>PapD</i>                                                                                        | <i>papD</i>      |
| Fimbrial adapter <i>PapF</i>                                                                                         | <i>papF</i>      |
| PAP fimbrial minor pilin protein                                                                                     | <i>papH</i>      |
| regulatory protein <i>PapI</i>                                                                                       | <i>papI</i>      |
| Per-activated serine protease autotransporter enterotoxin <i>EspC</i> / autotransporter domain, T5aSS type secretion | <i>pic</i>       |
| Putative F1C and S fimbrial switch Regulatory protein                                                                | <i>sfaB</i>      |
| S fimbrial switch regulatory protein <i>SfaC</i>                                                                     | <i>sfaC</i>      |
| S fimbriae minor subunit <i>SfaD</i>                                                                                 | <i>sfaD</i>      |
| S fimbriae outer membrane usher <i>SfaF</i>                                                                          | <i>sfaF</i>      |
| S fimbriae minor subunit <i>SfaG</i>                                                                                 | <i>sfaG</i>      |
| regulatory protein <i>SfaX</i>                                                                                       | <i>sfaX</i>      |
| regulatory protein <i>SfaY</i>                                                                                       | <i>sfaY</i>      |
| outer membrane heme/hemoglobin receptor <i>ShuA</i>                                                                  | <i>shuA</i>      |
| Tir domain containing protein <i>TcpC</i>                                                                            | <i>tcpC</i>      |
| Hemoglobin protease                                                                                                  | <i>vat</i>       |
| E. coli common pilus chaperone <i>EcpE</i>                                                                           | <i>yagV/lecE</i> |
| iron acquisition regulator ( <i>YbtA</i> , AraC-like, required for transcription of <i>FyuA/psn,Irp2</i> )           | <i>ybtA</i>      |
| yersiniabactin siderophore biosynthetic enzyme, 2,3-dihydroxybenzoate-AMP ligase                                     | <i>ybtE</i>      |
| Iron siderophore ABC transporter, permease/ATP-binding protein <i>YbtP</i>                                           | <i>ybtP</i>      |
| Iron siderophore ABC transporter, permease/ATP-binding protein <i>YbtQ</i>                                           | <i>ybtQ</i>      |
| salicylate synthase <i>Irp9</i> of siderophore biosynthesis                                                          | <i>ybtS</i>      |
| Iron acquisition yersiniabactin synthesis enzyme <i>YbtT</i>                                                         | <i>ybtT</i>      |
| Yersiniabactin synthetase, thiazolinyil reductase component <i>Irp3</i>                                              | <i>ybtU</i>      |
| putative signal transducer                                                                                           | <i>ybtX</i>      |
| regulator protein <i>EcpR</i>                                                                                        | <i>ykgK/lecR</i> |
